# Supplementary material for: Compensatory effects conceal large uncertainties in the modelled processes behind the relationship between the El Niño–Southern Oscillation (ENSO) and CO 2
Source: Copernicus journal article supplement (doi:10.5194/esd-16-151-2025), 2025-01-21
Supplement: Supplementary file 1 [file esd-16-151-2025-supplement.pdf]

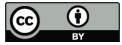

*Supplement of*

**Compensatory effects conceal large uncertainties in the modelled processes behind the relationship between the El Niño–Southern Oscillation (ENSO) and CO<sub>2</sub>**

**István Dunkl et al.**

*Correspondence to:* István Dunkl ([istvan.dunkl@uni-leipzig.de](mailto:istvan.dunkl@uni-leipzig.de))

The copyright of individual parts of the supplement might differ from the article licence.

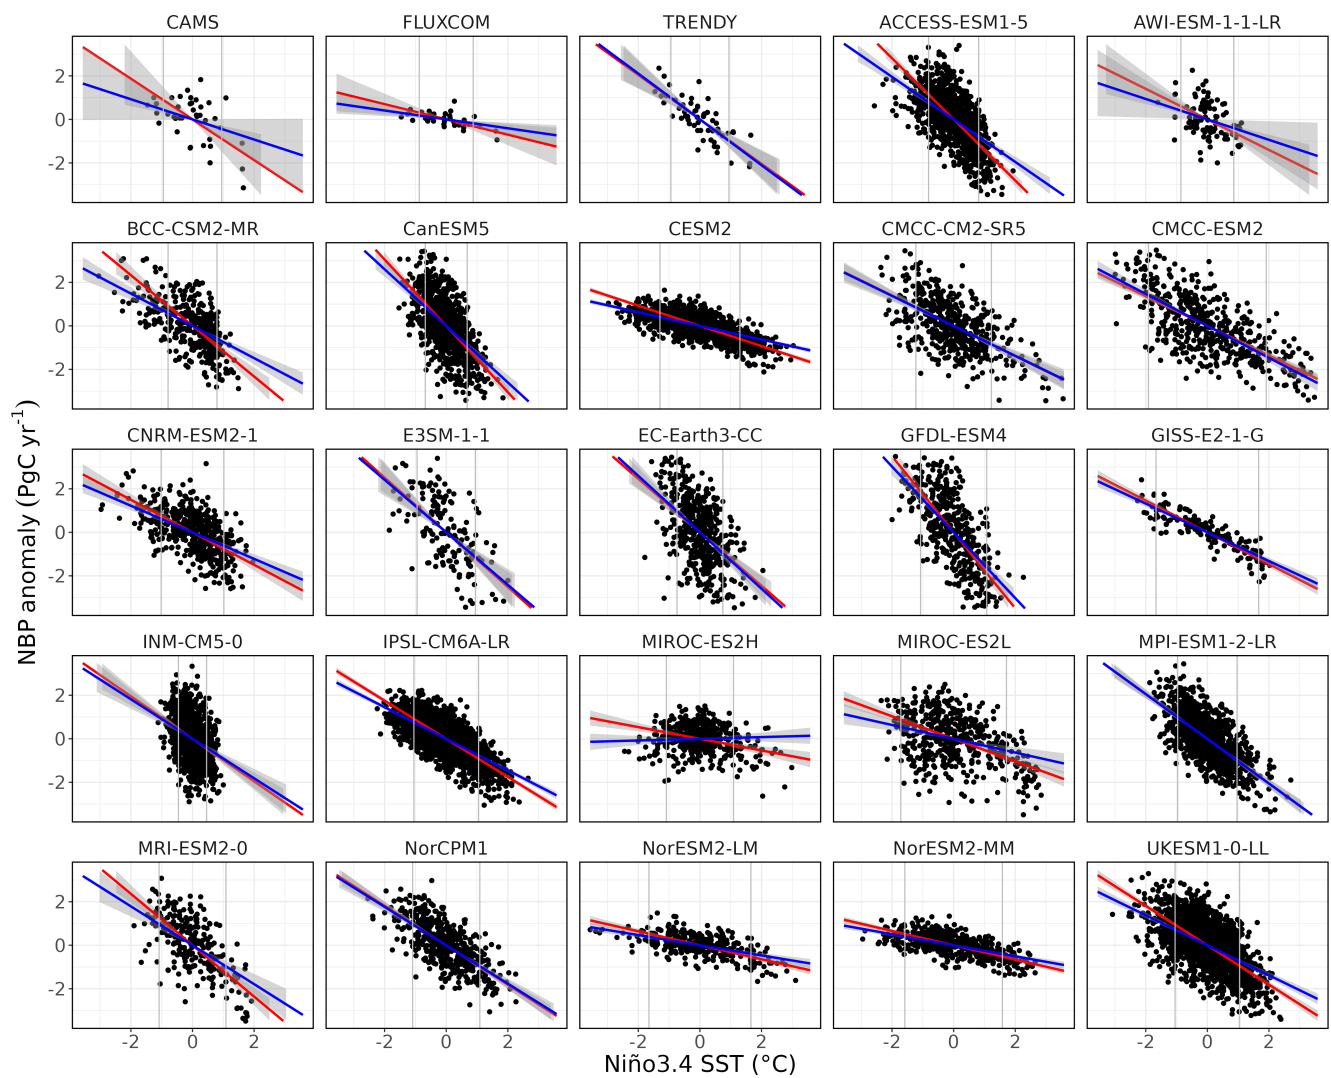

Figure S1: Global annual NBP anomalies against Niño3.4 SSTA in observational and ESM data. The red regression lines are fitted to SSTA values  $> 0$  and the blue lines to values  $< 0$ , the grey area represents the 95% confidence interval of the regression lines. The grey vertical lines are the 10th and 90th percentile of ENSO SSTAs.

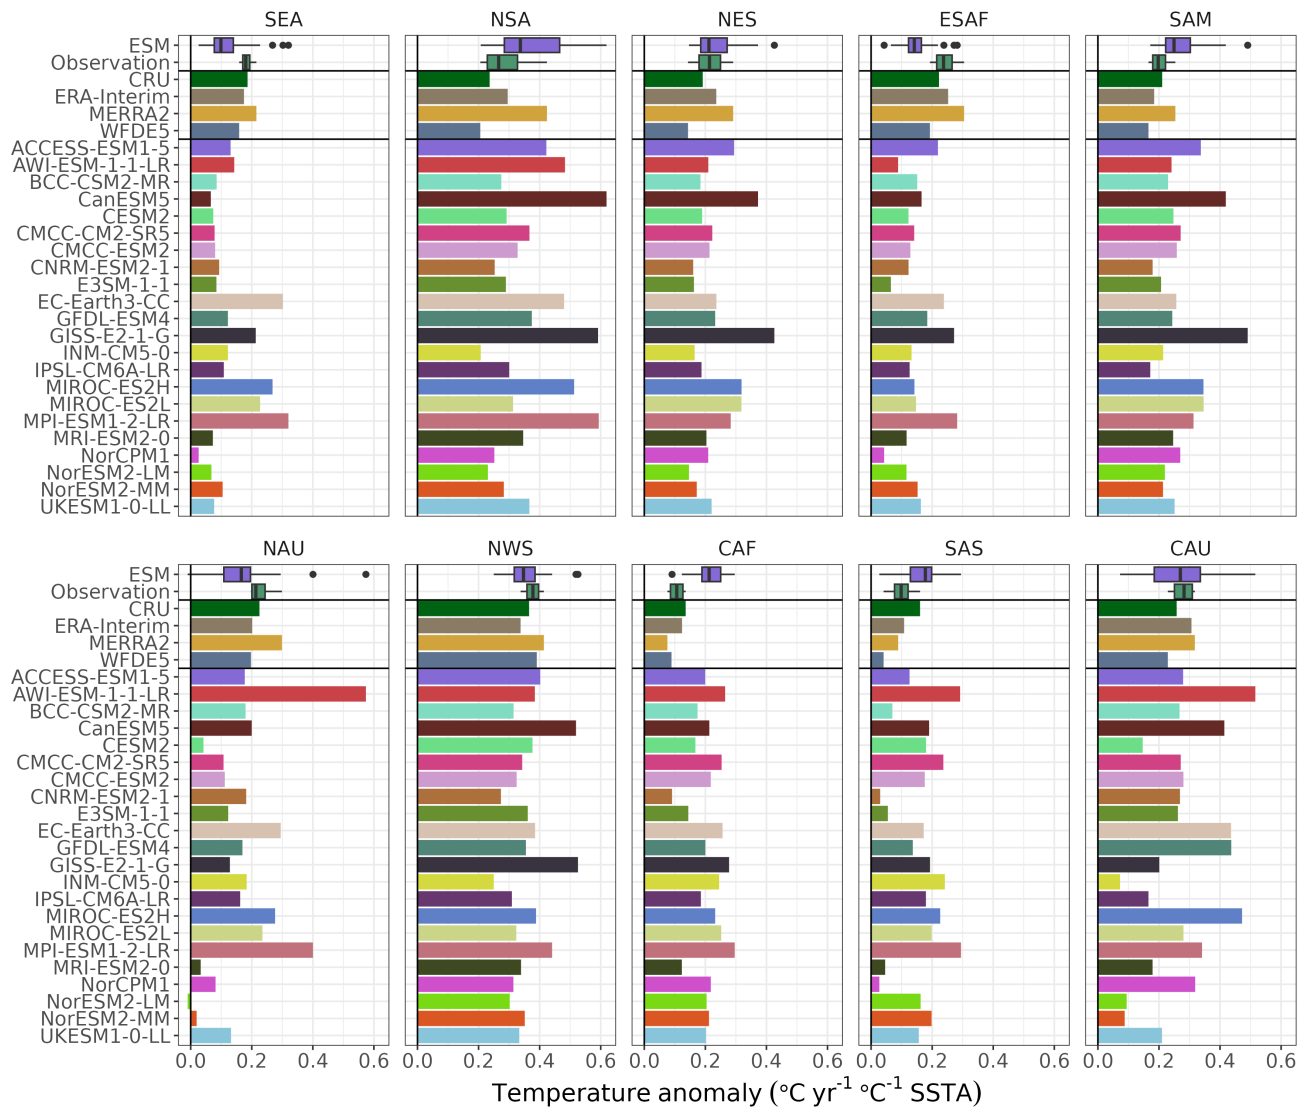

Figure S2: Regional ENSO-induced annual temperature anomalies. The values are the sensitivity of annual temperature anomalies to Niño3.4 SSTA ( $\beta_{ET}$ ).

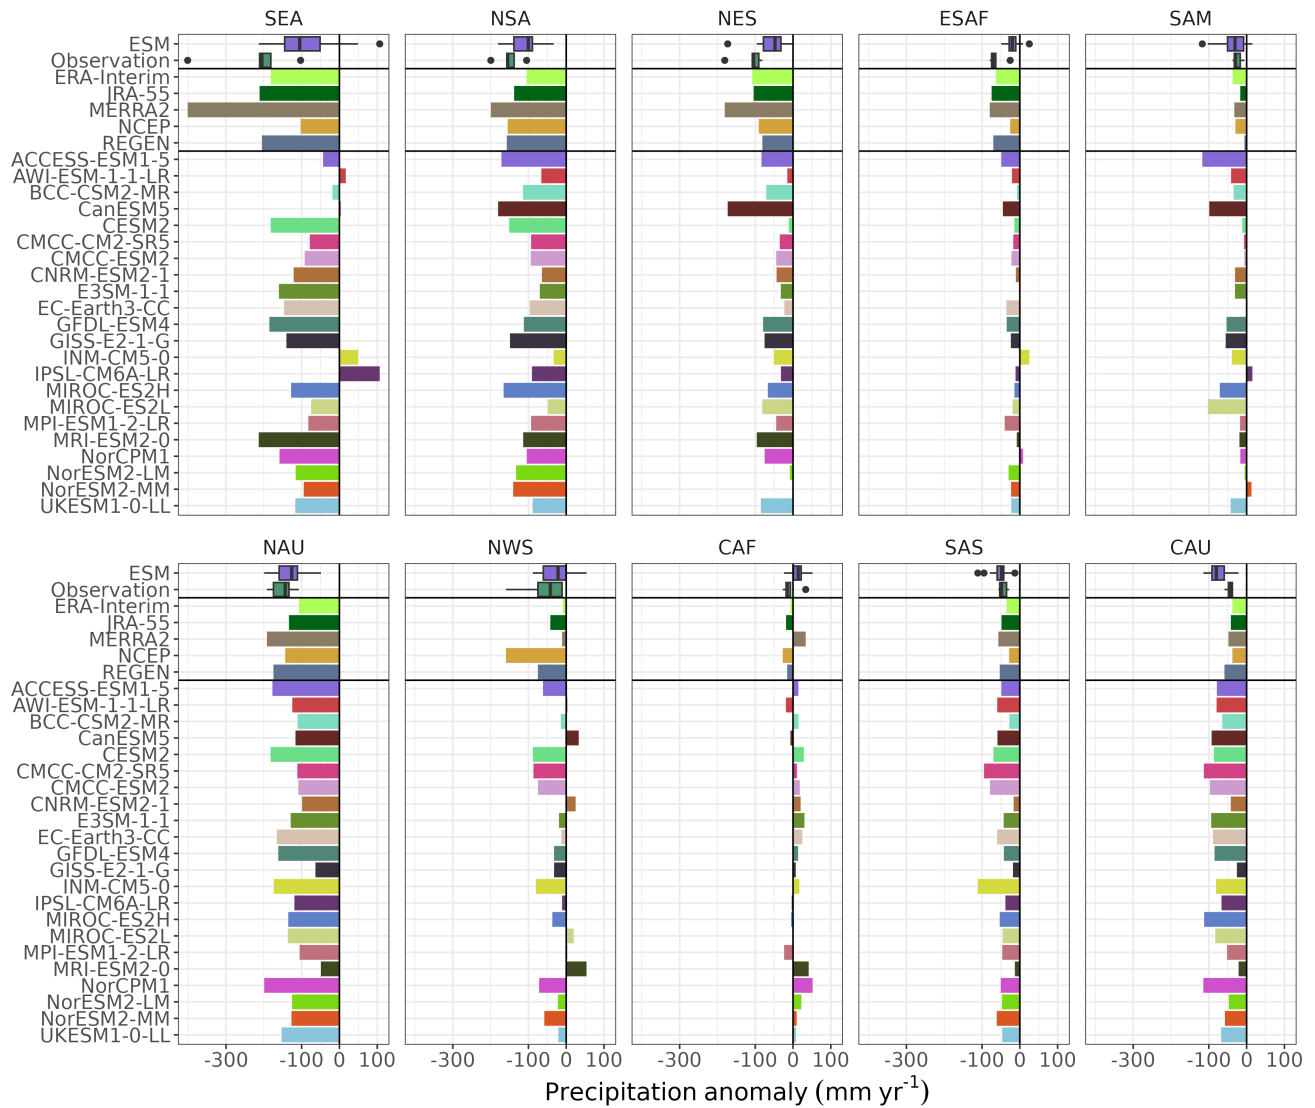

Figure S3: Regional ENSO-induced annual precipitation anomalies. The values show the sensitivity of annual precipitation anomalies to Niño3.4 SSTA ( $\beta_{Ep}$ ).

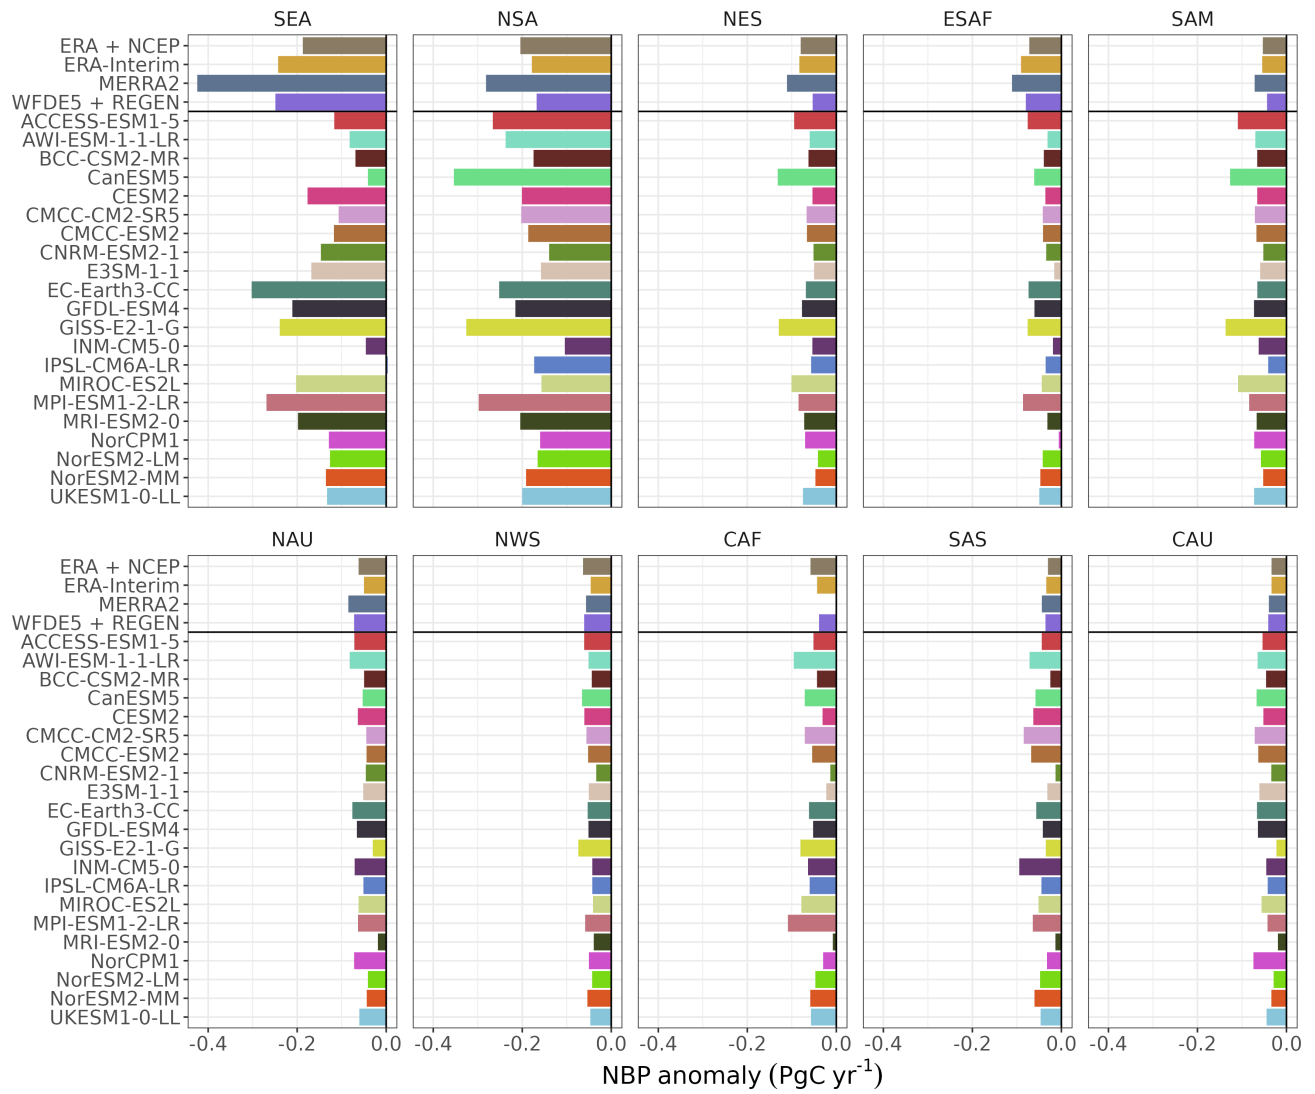

Figure S4: The effect of differences in ENSO-induced climate anomaly patterns on regional NBP anomalies. The climate anomaly patterns of a 90<sup>th</sup> percentile El Niño from ESMs and climate reanalysis products are applied to a linear regression model to reproduce global NBP anomalies.
